# Supplementary material for: Predictors of Adherence to Cancer-Related mHealth Apps in Cancer Patients Undergoing Oncological or Follow-Up Treatment—A Scoping Review
Source: MDPI journal article supplement (doi:10.3390/ijerph192013689), 2022-10-21
Supplement: s1 [file s1]

# Supplementary Material S1: Search strategy.

## All terms used for the electronic database search in PubMed:

| No. | P                                                                                        | I                                                                  | O                                                                                                                                                                                      | Hits        |
|-----|------------------------------------------------------------------------------------------|--------------------------------------------------------------------|----------------------------------------------------------------------------------------------------------------------------------------------------------------------------------------|-------------|
| 1   | cancer [MeSh] OR cancer [All Fields] OR cancer*                                          | "mobile applications" [MeSh] OR "mobile applications" [All Fields] | (adhere* [All Fields] OR adopt* [All Fields] OR accept* [All Fields] OR engage* [All Fields] OR usab* [All Fields] OR usage [All Fields] OR eval*[All Fields] OR feasab* [All Fields]) | 345         |
| 2   | cancer [MeSh] OR cancer [All Fields] OR cancer*                                          | telemedicine[MeSH Terms] OR "telemedicine"[All Fields]             | (adhere* [All Fields] OR adopt* [All Fields] OR accept* [All Fields] OR engage* [All Fields] OR usab* [All Fields] OR usage [All Fields] OR eval*[All Fields] OR feasab* [All Fields]) | 1333        |
| 3   | cancer [MeSh] OR cancer [All Fields] OR cancer*                                          | "mhealth's"[All Fields] OR "mhealth"[All Fields]                   | (adhere* [All Fields] OR adopt* [All Fields] OR accept* [All Fields] OR engage* [All Fields] OR usab* [All Fields] OR usage [All Fields] OR eval*[All Fields] OR feasab* [All Fields]) | 443         |
| 4   | "radiotherapy"[MeSH Terms] OR "radiotherapy"[All Fields] OR "radiotherapies"[All Fields] | "mobile applications" [MeSh] OR "mobile applications" [All Fields] | (adhere* [All Fields] OR adopt* [All Fields] OR accept* [All Fields] OR engage* [All Fields] OR usab* [All Fields] OR usage [All Fields] OR eval*[All Fields] OR feasab* [All Fields]) | 14          |
| 5   | "radiotherapy"[MeSH Terms] OR "radiotherapy"[All Fields] OR "radiotherapies"[All Fields] | telemedicine[MeSH Terms] OR "telemedicine"[All Fields]             | (adhere* [All Fields] OR adopt* [All Fields] OR accept* [All Fields] OR engage* [All Fields] OR usab* [All Fields] OR usage [All Fields] OR eval*[All Fields] OR feasab* [All Fields]) | 68          |
| 6   | "radiotherapy"[MeSH Terms] OR "radiotherapy"[All Fields] OR "radiotherapies"[All Fields] | "mhealth's"[All Fields] OR "mhealth"[All Fields]                   | (adhere* [All Fields] OR adopt* [All Fields] OR accept* [All Fields] OR engage* [All Fields] OR usab* [All Fields] OR usage [All Fields] OR eval*[All Fields] OR feasab* [All Fields]) | 15          |
| 7   | onco* OR "oncology"[All Fields] OR "oncology's"[All Fields]                              | "mobile applications" [MeSh] OR "mobile applications" [All Fields] | (adhere* [All Fields] OR adopt* [All Fields] OR accept* [All Fields] OR engage* [All Fields] OR usab* [All Fields] OR usage [All Fields] OR eval*[All Fields] OR feasab* [All Fields]) | 128         |
| 8   | onco* OR "oncology"[All Fields] OR "oncology's"[All Fields]                              | telemedicine[MeSH Terms] OR "telemedicine"[All Fields]             | (adhere* [All Fields] OR adopt* [All Fields] OR accept* [All Fields] OR engage* [All Fields] OR usab* [All Fields] OR usage [All Fields] OR eval*[All Fields] OR feasab* [All Fields]) | 614         |
| 9   | onco* OR "oncology"[All Fields] OR "oncology's"[All Fields]                              | "mhealth's"[All Fields] OR "mhealth"[All Fields]                   | (adhere* [All Fields] OR adopt* [All Fields] OR accept* [All Fields] OR engage* [All Fields] OR usab* [All Fields] OR usage [All Fields] OR eval*[All Fields] OR feasab* [All Fields]) | 164         |
| 10  | "neoplasms"[MeSH Terms] OR "neoplasms"[All Fields]                                       | "mobile applications" [MeSh] OR "mobile applications" [All Fields] | (adhere* [All Fields] OR adopt* [All Fields] OR accept* [All Fields] OR engage* [All Fields] OR usab* [All Fields] OR usage [All Fields] OR eval*[All Fields] OR feasab* [All Fields]) | 194         |
| 11  | "neoplasms"[MeSH Terms] OR "neoplasms"[All Fields]                                       | telemedicine[MeSH Terms] OR "telemedicine"[All Fields]             | (adhere* [All Fields] OR adopt* [All Fields] OR accept* [All Fields] OR engage* [All Fields] OR usab* [All Fields] OR usage [All Fields] OR eval*[All Fields] OR feasab* [All Fields]) | 873         |
| 12  | "neoplasms"[MeSH Terms] OR "neoplasms"[All Fields]                                       | "mhealth's"[All Fields] OR "mhealth"[All Fields]                   | (adhere* [All Fields] OR adopt* [All Fields] OR accept* [All Fields] OR engage* [All Fields] OR usab* [All Fields] OR usage [All Fields] OR eval*[All Fields] OR feasab* [All Fields]) | 129         |
|     |                                                                                          |                                                                    | <b>Sum</b>                                                                                                                                                                             | <b>4320</b> |

## All terms used for the electronic database search in CINAHL:

| No.        | P                                                                                                              | I                                                                                                                                                                   | O                                                                                                                                                             | Hits        |
|------------|----------------------------------------------------------------------------------------------------------------|---------------------------------------------------------------------------------------------------------------------------------------------------------------------|---------------------------------------------------------------------------------------------------------------------------------------------------------------|-------------|
| 1          | ((MH "Cancer Patients") OR "cancer care" OR (MH "Cancer Survivors") OR "cancer survivors" OR cance* OR carci*) | ((MH "Mobile Applications") OR "mobile applications" OR "mobile apps" )                                                                                             | (adhere* OR adopt* OR accept* OR engage* OR usab* OR usage OR eval* OR feasab* OR (MH "Motivation") OR "engagement and motivation" OR (MH "Usability Study")) | 181         |
| 2          | ((MH "Cancer Patients") OR "cancer care" OR (MH "Cancer Survivors") OR "cancer survivors" OR cance* OR carci*) | ((MH "Internet-Based Intervention") OR (MH "Telemedicine") OR (MH "Telehealth") OR "telemedicine" OR "mHealth" OR "mobile health" OR "mobile devices" OR "ehealth") | (adhere* OR adopt* OR accept* OR engage* OR usab* OR usage OR eval* OR feasab* OR (MH "Motivation") OR "engagement and motivation" OR (MH "Usability Study")) | 629         |
| 3          | ((MH "Cancer Patients") OR "cancer care" OR (MH "Cancer Survivors") OR "cancer survivors" OR cance* OR carci*) | ((MH "Smartphone") OR (MH "Cellular Phone") OR tablet)                                                                                                              | (adhere* OR adopt* OR accept* OR engage* OR usab* OR usage OR eval* OR feasab* OR (MH "Motivation") OR "engagement and motivation" OR (MH "Usability Study")) | 426         |
| 4          | ((MH "Radiation Oncology") OR radiotherapy OR "radiation therapy")                                             | ((MH "Mobile Applications") OR "mobile applications" OR "mobile apps" )                                                                                             | (adhere* OR adopt* OR accept* OR engage* OR usab* OR usage OR eval* OR feasab* OR (MH "Motivation") OR "engagement and motivation" OR (MH "Usability Study")) | 11          |
| 5          | ((MH "Radiation Oncology") OR radiotherapy OR "radiation therapy")                                             | ((MH "Internet-Based Intervention") OR (MH "Telemedicine") OR (MH "Telehealth") OR "telemedicine" OR "mHealth" OR "mobile health" OR "mobile devices" OR "ehealth") | (adhere* OR adopt* OR accept* OR engage* OR usab* OR usage OR eval* OR feasab* OR (MH "Motivation") OR "engagement and motivation" OR (MH "Usability Study")) | 25          |
| 6          | ((MH "Radiation Oncology") OR radiotherapy OR "radiation therapy")                                             | ((MH "Smartphone") OR (MH "Cellular Phone") OR tablet)                                                                                                              | (adhere* OR adopt* OR accept* OR engage* OR usab* OR usage OR eval* OR feasab* OR (MH "Motivation") OR "engagement and motivation" OR (MH "Usability Study")) | 35          |
| 7          | ((MH "Oncology") OR "oncology" OR (MH "Oncologic Care") OR (MH "Oncology Care Units") OR "oncology patients")  | ((MH "Mobile Applications") OR "mobile applications" OR "mobile apps")                                                                                              | (adhere* OR adopt* OR accept* OR engage* OR usab* OR usage OR eval* OR feasab* OR (MH "Motivation") OR "engagement and motivation" OR (MH "Usability Study")) | 38          |
| 8          | ((MH "Oncology") OR "oncology" OR (MH "Oncologic Care") OR (MH "Oncology Care Units") OR "oncology patients")  | ((MH "Internet-Based Intervention") OR (MH "Telemedicine") OR (MH "Telehealth") OR "telemedicine" OR "mHealth" OR "mobile health" OR "mobile devices" OR "ehealth") | (adhere* OR adopt* OR accept* OR engage* OR usab* OR usage OR eval* OR feasab* OR (MH "Motivation") OR "engagement and motivation" OR (MH "Usability Study")) | 155         |
| 9          | ((MH "Oncology") OR "oncology" OR (MH "Oncologic Care") OR (MH "Oncology Care Units") OR "oncology patients")  | ((MH "Smartphone") OR (MH "Cellular Phone") OR tablet)                                                                                                              | (adhere* OR adopt* OR accept* OR engage* OR usab* OR usage OR eval* OR feasab* OR (MH "Motivation") OR "engagement and motivation" OR (MH "Usability Study")) | 59          |
| 10         | ((MH "Neoplasms") OR (MH "Neoplasm Metastasis") OR neoplasm OR tumor)                                          | ((MH "Mobile Applications") OR "mobile applications" OR "mobile apps" )                                                                                             | (adhere* OR adopt* OR accept* OR engage* OR usab* OR usage OR eval* OR feasab* OR (MH "Motivation") OR "engagement and motivation" OR (MH "Usability Study")) | 138         |
| 11         | ((MH "Neoplasms") OR (MH "Neoplasm Metastasis") OR neoplasm OR tumor)                                          | ((MH "Internet-Based Intervention") OR (MH "Telemedicine") OR (MH "Telehealth") OR "telemedicine" OR "mHealth" OR "mobile health" OR "mobile devices" OR "ehealth") | (adhere* OR adopt* OR accept* OR engage* OR usab* OR usage OR eval* OR feasab* OR (MH "Motivation") OR "engagement and motivation" OR (MH "Usability Study")) | 421         |
| 12         | ((MH "Neoplasms") OR (MH "Neoplasm Metastasis") OR neoplasm OR tumor)                                          | ((MH "Smartphone") OR (MH "Cellular Phone") OR tablet)                                                                                                              | (adhere* OR adopt* OR accept* OR engage* OR usab* OR usage OR eval* OR feasab* OR (MH "Motivation") OR "engagement and motivation" OR (MH "Usability Study")) | 347         |
| <b>Sum</b> |                                                                                                                |                                                                                                                                                                     |                                                                                                                                                               | <b>2465</b> |

# All terms used for the electronic database search in PsychINFO:

| No.        | P                                                                                                          | I                                                                                           | O                                                                                                                      | Hits        |
|------------|------------------------------------------------------------------------------------------------------------|---------------------------------------------------------------------------------------------|------------------------------------------------------------------------------------------------------------------------|-------------|
| 1          | ((DE "Terminal Cancer" OR (DE "Metastasis") OR "cancer patients" OR "cancer survivors" OR carc* OR cancer) | ((DE "Mobile Applications") OR "mobile app" OR "mobile health app")                         | ((DE "Smartphone Use") OR adhere* OR adopt* OR accept* OR engage* OR usab* OR usage OR eval* OR feasab* OR motivation) | 59          |
| 2          | ((DE "Terminal Cancer" OR (DE "Metastasis") OR "cancer patients" OR "cancer survivors" OR carc* OR cancer) | ((DE "Mobile Health") OR (DE "Telemedicine") OR mhealth OR ehealth)                         | ((DE "Smartphone Use") OR adhere* OR adopt* OR accept* OR engage* OR usab* OR usage OR eval* OR feasab* OR motivation) | 385         |
| 3          | ((DE "Terminal Cancer" OR (DE "Metastasis") OR "cancer patients" OR "cancer survivors" OR carc* OR cancer) | (Smartphone OR "cellular phone" OR (DE "Mobile Devices") OR (DE "Mobile Phones") OR Tablet) | ((DE "Smartphone Use") OR adhere* OR adopt* OR accept* OR engage* OR usab* OR usage OR eval* OR feasab* OR motivation) | 195         |
| 4          | (radiotherapy OR "radiation therapy")                                                                      | ((DE "Mobile Applications") OR "mobile app" OR "mobile health app")                         | ((DE "Smartphone Use") OR adhere* OR adopt* OR accept* OR engage* OR usab* OR usage OR eval* OR feasab* OR motivation) | 1           |
| 5          | (radiotherapy OR "radiation therapy")                                                                      | ((DE "Mobile Health") OR (DE "Telemedicine") OR mhealth OR ehealth)                         | ((DE "Smartphone Use") OR adhere* OR adopt* OR accept* OR engage* OR usab* OR usage OR eval* OR feasab* OR motivation) | 6           |
| 6          | (radiotherapy OR "radiation therapy")                                                                      | (Smartphone OR "cellular phone" OR (DE "Mobile Devices") OR (DE "Mobile Phones") OR Tablet) | ((DE "Smartphone Use") OR adhere* OR adopt* OR accept* OR engage* OR usab* OR usage OR eval* OR feasab* OR motivation) | 6           |
| 7          | ((MM "Oncology") OR oncolo* OR "oncolo* care")                                                             | ((DE "Mobile Applications") OR "mobile app" OR "mobile health app")                         | ((DE "Smartphone Use") OR adhere* OR adopt* OR accept* OR engage* OR usab* OR usage OR eval* OR feasab* OR motivation) | 23          |
| 8          | ((MM "Oncology") OR oncolo* OR "oncolo* care")                                                             | ((DE "Mobile Health") OR (DE "Telemedicine") OR mhealth OR ehealth)                         | ((DE "Smartphone Use") OR adhere* OR adopt* OR accept* OR engage* OR usab* OR usage OR eval* OR feasab* OR motivation) | 151         |
| 9          | ((MM "Oncology") OR oncolo* OR "oncolo* care")                                                             | (Smartphone OR "cellular phone" OR (DE "Mobile Devices") OR (DE "Mobile Phones") OR Tablet) | ((DE "Smartphone Use") OR adhere* OR adopt* OR accept* OR engage* OR usab* OR usage OR eval* OR feasab* OR motivation) | 57          |
| 10         | ((DE "Neoplasms") OR neoplas*)                                                                             | ((DE "Mobile Applications") OR "mobile app" OR "mobile health app")                         | ((DE "Smartphone Use") OR adhere* OR adopt* OR accept* OR engage* OR usab* OR usage OR eval* OR feasab* OR motivation) | 38          |
| 11         | ((DE "Neoplasms") OR neoplas*)                                                                             | ((DE "Mobile Health") OR (DE "Telemedicine") OR mhealth OR ehealth)                         | ((DE "Smartphone Use") OR adhere* OR adopt* OR accept* OR engage* OR usab* OR usage OR eval* OR feasab* OR motivation) | 229         |
| 12         | ((DE "Neoplasms") OR neoplas*)                                                                             | (Smartphone OR "cellular phone" OR (DE "Mobile Devices") OR (DE "Mobile Phones") OR Tablet) | ((DE "Smartphone Use") OR adhere* OR adopt* OR accept* OR engage* OR usab* OR usage OR eval* OR feasab* OR motivation) | 100         |
| <b>Sum</b> |                                                                                                            |                                                                                             |                                                                                                                        | <b>1250</b> |
